# Neuregulin Facilitates Nerve Regeneration by Speeding Schwann Cell Migration via ErbB2/3-Dependent FAK Pathway

Hung-Ming Chang<sup>1</sup>, Ming-Kwang Shyu<sup>2</sup>, Guo-Fang Tseng<sup>3</sup>, Chiung-Hui Liu<sup>4</sup>, Hung-Shuo Chang<sup>2</sup>, Chyn-Tair Lan<sup>5</sup>, Wen-Ming Hsu<sup>6</sup>, Wen-Chieh Liao<sup>5,7\*</sup>

**1** Department of Anatomy, School of Medicine, College of Medicine, Taipei Medical University, Taipei, Taiwan, **2** Department of Obstetrics and Gynecology, National Taiwan University Hospital, Taipei, Taiwan, **3** Department of Anatomy, College of Medicine, Tzu Chi University, Hualien, Taiwan, **4** Graduate Institute of Anatomy and Cell Biology, College of Medicine, National Taiwan University, Taipei, Taiwan, **5** Department of Anatomy, Faculty of Medicine, Chung Shan Medical University, Taichung, Taiwan, **6** Division of Pediatric Surgery, Department of Surgery, National Taiwan University Hospital, Taipei, Taiwan, **7** Department of Pediatrics, Chung Shan Medical University Hospital, Taichung, Taiwan

## Abstract

**Background:** Adequate migration of Schwann cells (Sc) is crucial for axon-guidance in the regenerative process after peripheral nerve injury (PNI). Considering neuregulin-erbB-FAK signaling is an essential pathway participating in the regulation of Sc migration during development, the present study is aimed to examine whether neuregulin would exert its beneficial effects on adult following PNI and further determine the potential changes of downstream pathway engaged in neuro-regeneration by both *in vitro* and *in vivo* approaches.

**Methodology and Principal Findings:** Cultured RSC96 cells treated with neuregulin were processed for erbB2/3 immunofluorescence and FAK immunoblottings. The potential effects of neuregulin on Sc were assessed by cell adherence, spreading, and migration assays. In order to evaluate the functional significance of neuregulin on neuro-regeneration, the *in vivo* model of PNI was performed by chronic end-to-side neurotomy (ESN). *In vitro* studies indicated that after neuregulin incubation, erbB2/3 were not only expressed in cell membranes, but also distributed throughout the cytoplasm and nucleus of RSC96 cells. Activation of erbB2/3 was positively correlated with FAK phosphorylation. Neuregulin also increases Sc adherence, spreading, and migration by 127.2±5.0%, 336.8±3.0%, and 80.0±5.7%, respectively. As for *in vivo* study, neuregulin significantly accelerates the speed of Sc migration and increases Sc expression in the distal stump of injured nerves. Retrograde labeling and compound muscle action potential recordings (CMAP) also showed that neuregulin successfully facilitates nerve regeneration by eliciting noticeably larger CMAP and promoting quick re-innervation of target muscles.

**Conclusions:** As neuregulin successfully improves axo-glia interaction by speeding Sc migration via the erbB2/3-FAK pathway, therapeutic use of neuregulin may thus serve as a promising strategy to facilitate the progress of nerve regeneration after PNI.

**Citation:** Chang H-M, Shyu M-K, Tseng G-F, Liu C-H, Chang H-S, et al. (2013) Neuregulin Facilitates Nerve Regeneration by Speeding Schwann Cell Migration via ErbB2/3-Dependent FAK Pathway. PLoS ONE 8(1): e53444. doi:10.1371/journal.pone.0053444

**Editor:** Shilpa J. Buch, University of Nebraska Medical Center, United States of America

**Received:** September 12, 2012; **Accepted:** November 28, 2012; **Published:** January 2, 2013

**Copyright:** © 2013 Chang et al. This is an open-access article distributed under the terms of the Creative Commons Attribution License, which permits unrestricted use, distribution, and reproduction in any medium, provided the original author and source are credited.

**Funding:** This study is supported by the research grants (NSC 99-2320-B-040-002-MY3 and NSC 101-2320-B-040-003) to Dr. H-M Chang and Dr. W-C Liao from the National Science Council, Taiwan. The funders had no role in study design, data collection and analysis, decision to publish, or preparation of the manuscript.

**Competing Interests:** The authors have declared that no competing interests exist.

\* E-mail: khnangel@gmail.com

## Introduction

Peripheral nerve injury (PNI) is one of the most common and important injuries in the current societies [1–3]. Previous studies had indicated that after PNI, complete fragmentation of distal axons, degradation of myelin sheath and infiltration of macrophages would occur in the distal stump of lesioned nerves [4,5]. Biochemical reports also demonstrated that following PNI, remnant Schwann cells (Sc) would gradually migrate to the injured site and provide supportive effects to proximal axons which promotes successive neuro-regeneration [6,7]. By expressing a variety of trophic factors, Sc could serve as a “transient target” for axon sprouting and play an important role in the

regulation of axo-glia interactions [8]. However, it is indicated that Sc always takes much time to proliferate and migrate into the terminal end of lesioned nerves [9]. As the functional maintenance of peripheral nerves is crucially dependent on proper signaling between Sc and axons [10], detail investigating the signal pathway involved in axo-glia interaction will not only help us to better understand the molecular mechanisms of neuro-regeneration, but also provides important insights into the clinical design of therapeutic agents that facilitate Sc migration following PNI.

Neuregulin-1 (NRG1) is one of a family of growth factors essential for the survival, proliferation, differentiation, and migration of both neurons and glia cells during development

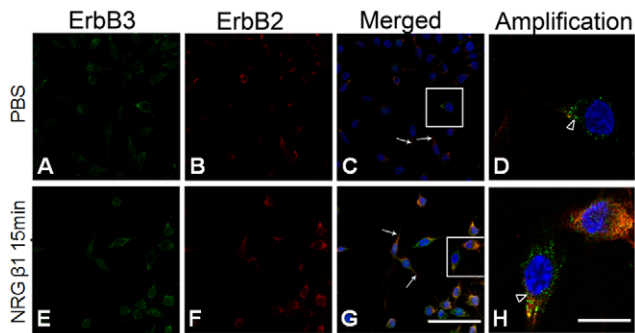

**Figure 1. Confocal photomicrographs showing erbB2 (red) and erbB3 (green) receptor expressions in the culture RSC96 cells following phosphate buffer saline (PBS) (A–D) and neuregulin  $\beta$ 1 (NRG  $\beta$ 1) treatment (E–H).** The cell nucleus was stained by DAPI (blue). Note that in both PBS and NRG  $\beta$ 1 treatment groups, the erbB2 and erbB3 immunoreactivities were present in cell membrane and cell processes (arrows in C, G). However, after NRG  $\beta$ 1 treatment (10nM) for 15 minutes, more RSC96 cells (G) with erbB2 and erbB3 co-localization (yellow) in the perinuclear area [arrowhead in (H)] showing high magnification of rectangles labeled in (G) was observed than that of PBS group (C,D). Scale bar = 20  $\mu$ m in (A, B, C, E, F, G) and represents 5  $\mu$ m in (D, H).

doi:10.1371/journal.pone.0053444.g001

[11,12]. Through binding to erbB2/3 receptors, NRG1 could activate numerous signal transduction pathways that regulate multiple aspects of Sc activity [13,14]. At least two major forms of NRG1 ( $\alpha$  and  $\beta$ ) differing in the sequence of approximately 6–8 amino acids have been described [15]. The  $\beta$  form of NRG1 (NRG  $\beta$ 1) is by far the most widely studied and has been reported to be more effective than  $\alpha$  one through high binding affinity to erbB receptors [16]. *In vitro* evidences have demonstrated that NRG  $\beta$ 1 is a potent mitogen for developing Scs and could promote the motility of a number of cell types [17–19]. Pharmacological studies also reported that ablation of NRG1 would slow the progress of nerve regeneration and impair the functional recovery following nerve injury [20]. It is indicated that endogenous NRG1 may act as a chemoattractant to Scs and play an important role in the regulation of Sc migration after PNI [20]. With regard to this viewpoint, endogenous activation or exogenous applications of NRG1 would thus serve as a practical way to speed the Sc migration and facilitate the nerve regeneration under severe neuronal damage.

However, although the functional role of NRG1 in the regulation of Sc activity during development has been well documented, the potential effect of NRG1 and its downstream pathway engaged in the modulation of Sc migration through adulthood has not yet been reported. Moreover, whether exogenous treatment of NRG1 would significantly improve the nerve regeneration by greatly speeding the Sc migration following PNI is still remained to be explored. Considering focal adhesion kinase (FAK) is an essential molecule participated in the regulation of cell migration via NRG1 mediated erbB2/3 activation [21], the present study is firstly aimed to examine the potential expression of NRG1-erbB-FAK signaling in the promotion of mature Sc migration by the *in vitro* analysis. Secondly, in order to test the *in vivo* effects of NRG1 on facilitating the nerve regeneration following PNI, the degree of muscle re-innervation as well as the extents of Sc migration was assessed at different time points under the lesion model of chronic end-to-side neurorrhaphy (ESN). As ESN has previously been reported to take much time to attain successful nerve regeneration than that of general neurectomy

[22], this model was thus served as a good paradigm for providing enough time courses for us to evaluate the speeding functions of NRG1 in the regenerative process following traumatic nerve injury.

## Materials and Methods

### RSC96 Cell Culture

RSC96 cells were purchased from the Bio-resource Collection and Research Center (BCRC, Hsinchu, Taiwan) and were cultured in Dulbecco's modified Eagle's medium (DMEM) (Invitrogen, Carlsbad, CA, USA) supplemented with 10% fetal bovine serum (FBS), 4 mM L-glutamate, 1.5 g/L sodium bicarbonate and 4.5 g/L glucose in humidified atmosphere of 5% CO<sub>2</sub> and 95% air. After incubation, the cells were harvested and extracted for further analysis.

### Cell Adhesion Assay

Cell adhesion assay were performed according to the previous study [23]. Ninety-six well plates (Nalge Nunc, Rochester, NY, USA) were first blocked with 1% (wt/vol) bovine serum albumin (BSA) at 37°C for 2 hours. Cultured RSC96 Cells ( $2 \times 10^4$ ) were then trypsinized, washed with DMEM, and re-suspended in 100  $\mu$ L serum-free DMEM with NRG  $\beta$ 1 treatment (PeproTech, Rocky Hill, NJ, USA) at the concentration of 10 nM. Following that, cells were allowed to attach for 30 min. at 37°C in a humidified incubator of 5% CO<sub>2</sub>. Nonspecific adherent cells were removed by washing the well with phosphate buffer saline (PBS). The number of specific adherent cell (with or without NRG  $\beta$ 1 treatment) was then counted manually with an inverted microscope.

### Cell Spreading Assay

For cell spreading analysis, twenty-four well plates (Nalge Nunc, Rochester, NY, USA) were first coated with poly-L-lysine (PLL, 1  $\mu$ g/mL) (Sigma-Aldrich, St. Louis, MO, USA) at 4°C. Nonspecific binding was blocked by 1% (wt/vol) BSA for 1 hour at 37°C. Cultured RSC96 cells were then seeded at a density of  $5 \times 10^4$  cells per well in 1 mL DMEM and 10% FBS. NRG  $\beta$ 1 at the concentration of 10 nM was added and the cells were allowed to spread for 17 hours at 37°C. Following that, cells were washed with PBS three times, and then fixed in 4% paraformaldehyde solution. Six separate fields per well were photomicrographed with an inverted microscope. Cell spreading was characterized by the formation of a clearly defined cytoplasmic halo around the cell nucleus and spindle process as described previously [14]. RSC96 cells demonstrating this phenomenon were counted and the percentage of the total number of RSC96 cells per field was calculated. Results from six fields were then averaged to get the mean percentage of each well.

### Cell Migration Assay

Cultured RSC96 cells ( $3 \times 10^4$ ) re-suspending in serum-free DMEM were added to the top well of each migration (Boyden) chamber with the pore membrane size of 8  $\mu$ m (Transwell, Corning Life Sciences, Acton, MA, USA). Cell migration was induced by serum-free DMEM with or without NRG  $\beta$ 1 treatment (10 nM) in a CO<sub>2</sub> incubator at 37°C for 24 hours. After that, the membrane was removed and the cells on the top side of the membrane were wiped off. The remaining migrating cells on the membrane were then fixed with 100% methanol and subsequently stained with crystal violet for 3 min. Photomicrographs were taken under light microscopy (Olympus CX31RTSF,

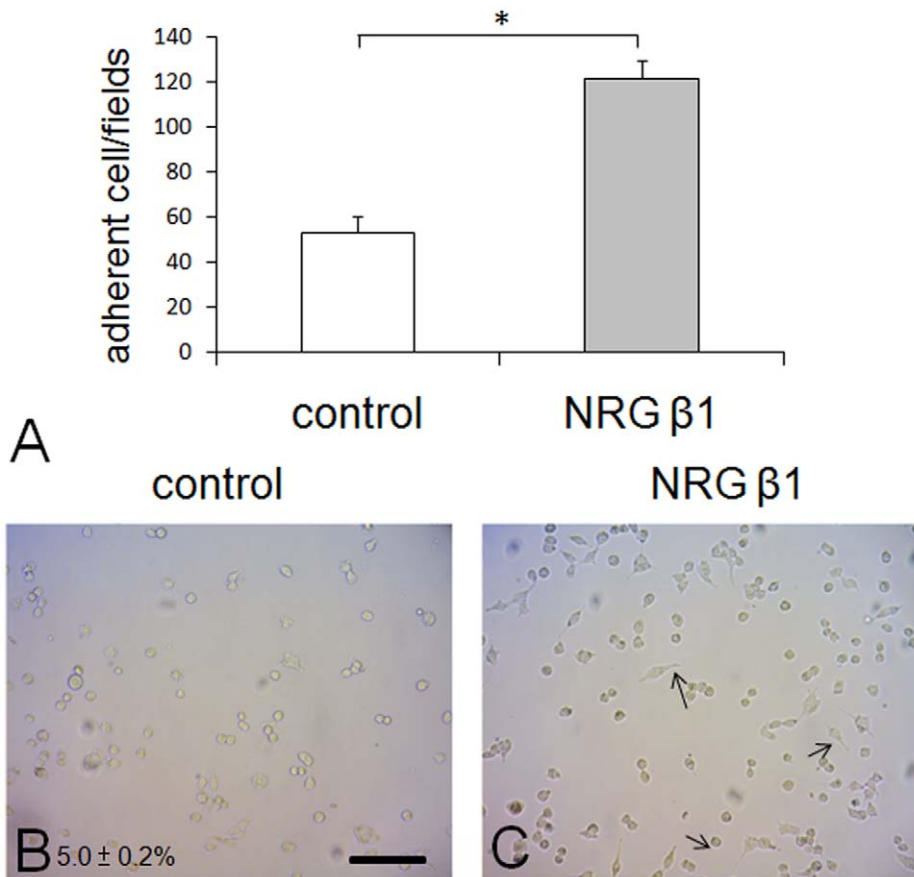

**Figure 2. Histogram (A) and photomicrographs (B, C) showing the cell adhesion and spreading assay in culture RSC96 cells following phosphate buffer saline (PBS, control) and neuregulin  $\beta$ 1 (NRG  $\beta$ 1) treatment.** Note that in cell adhesion assay, the number of adhered cells treated with NRG  $\beta$ 1 was significantly larger than that of PBS control group (A). Also note that in cell spreading assay, more spreading cells with prominent spindle processes (arrows in C) were observed in NRG  $\beta$ 1 treated group as compared to that of control ones (B). Scale bar = 40  $\mu$ m. \* $P$  < 0.05 as compared to that of control value. doi:10.1371/journal.pone.0053444.g002

Japan) and the number of migrating cells from six random fields per chamber was counted.

### ErbB2/3 Immunofluorescence

Cultured RSC96 cells grown on glass coverslips were first fixed for 30 min. with 4% paraformaldehyde. After blocking with 1% BSA, 0.3% (vol/vol) Triton X-100 and 1% normal goat serum for 30 min, the cells were incubated with blocking buffer containing primary antibodies against active form of erbB2 and erbB3 (dilution 1:100, Santa Cruz, CA, USA) at 4°C overnight. After washing with PBS thoroughly, cells were incubated with cy3-conjugated secondary antibody (Jackson ImmunoResearch, West Grove, PA, USA) for 1 hour at room temperature. Following that, cells were washed and mounted with ProLong Gold anti-fade reagent with DAPI nuclear (Invitrogen, Carlsbad, CA, USA). The immuno-expression of erbB2 and erbB3 were photomicrographed with the Leica TCS SP5 spectral confocal system (Leica, Wetzlar, Germany).

### Western Blot Analysis

Cultured RSC96 cells were seeded onto PDL pre-coated plates as described previously [14]. After 2 days *in vitro*, cells were starved for 4 hours and treated with NRG  $\beta$ 1 (10 nM) for 30 min. Following that, cells were scraped and the proteins were separated in 6% gradient SDS-PAGE. Nonspecific protein binding was

stopped in blocking buffer containing 5% milk, 20 mM Tris-HCl (pH 7.6), 150 mM NaCl, and 0.1% Tween 20. For detection of erbB2, erbB3 and its downstream signaling molecules, anti-phospho-tyrosine antibody 4G10 (Upstate Biotechnology, Lake Placid, NY, USA), anti-erbB2, anti-erbB3 (Santa Cruz, CA, USA), anti-FAK (Biosources, Nivelles, Belgium), anti-phosphorylated FAK (p-FAK, Biosources, Nivelles, Belgium), and anti- $\beta$ -actin (BD Pharmingen, San Jose, CA, USA) primary antibodies were applied to the nitrocellulose membranes. For detection of Schwann cells expression, anti-S-100 $\beta$  antibody (Sigma-Aldrich, St. Louis, MO, USA) was used. Immunoblotted membranes were then incubated with HRP-conjugated streptavidin, HRP-conjugated anti-rabbit IgG, or anti-mouse IgG (Santa Cruz, CA, USA). Immuno-signals were visualized with ECL reagents (Amersham Biosciences, Piscataway, NJ, USA). For quantification of immunoblottings, films were scanned and the intensity along with the ratio of specific p-FAK and FAK bands were quantified using the ImageJ 1.45 software (National Institute of Health, USA).

### Immunoprecipitation

In order to determine if erbB2 receptors were rapidly phosphorylated in response to NRG  $\beta$ 1, the immunoprecipitation experiments were further processed in the current study. Briefly, cultured RSC96 cells treated with NRG  $\beta$ 1 were stopped by the addition of ice cold lysis buffer. The lysates were then immuno-

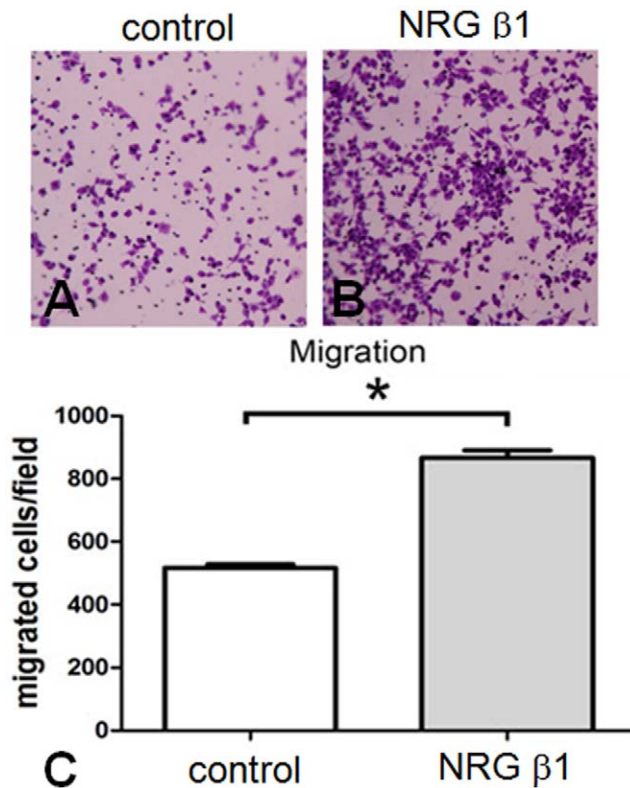

**Figure 3. Photomicrographs (A, B) and histogram (C) showing the cell migration assay in culture RSC96 cells following phosphate buffer saline (PBS, control) and neuregulin  $\beta$ 1 (NRG  $\beta$ 1) treatment.** The extent of cell migration was assessed by the Boyden chamber system. Note that numerous migrated cells stained with crystal violet were observed in NRG  $\beta$ 1 group (B) as compared with that of PBS control ones (A). Also note that similar findings were detected by quantitative counting in which NRG  $\beta$ 1 promotes more cell migration than that of PBS control group (C). \* $P < 0.05$  as compared to that of control value. doi:10.1371/journal.pone.0053444.g003

precipitated with protein A and protein G beads (1:1; Amersham Pharmacia, Piscataway, NJ, USA) conjugated anti-erbB2 antibody. After that, the precipitated proteins were then subjected to Western blotting as described previously.

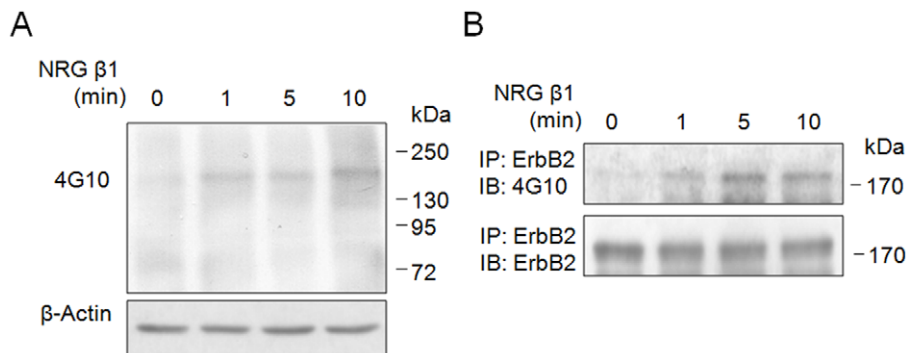

**Figure 4. Immunoblottings showing the effects of neuregulin  $\beta$ 1 (NRG  $\beta$ 1) on tyrosine phosphorylation of erbB2 receptor at different time points.** Note that NRG  $\beta$ 1 significantly induces rapid tyrosine phosphorylation of membrane protein (detected by 4G10 antibody) at 185 kDa (A). The 4G10-reactive phosphorylated protein at 185 kDa was further validated to be erbB2 receptor by immunoprecipitating with anti-erbB2 antibody and followed by Western blot analysis (B). The  $\beta$ -actin was used as an internal loading control. doi:10.1371/journal.pone.0053444.g004

### *In vivo* PNI Model and Animal Studies

A total of twenty-four young adult male Wistar rats (200~250 g) obtained from the Laboratory Animal Center of the Chung Shan Medical University were used. All experimental animals were equally divided into three groups ( $n = 8$  in each). The first group was subjected to end-to-side neurotomy (ESN) while the second group receiving ESN was subsequently given the NRG  $\beta$ 1 at a concentration of 10 nM. In the third group, no surgical or drug exposure was performed to serve as the normal un-treated control. During the experimental period, all rats were exposed to an automatically regulated light-dark cycle of 12:12 h (light on 07:00~19:00 hours) at a constant room temperature of  $25 \pm 1^\circ\text{C}$ .

### Ethics Statement

In the care and handling of all experimental animals, the Guide for the Care and Use of Laboratory Animals (1985) as stated in the United States NIH Guidelines (NIH publication no. 86-23) were followed. All experimental procedures with surgical exposure and NRG  $\beta$ 1 treatment were also approved by the Laboratory Animal Center Authorities of the Chung Shan Medical University (IACUC Approval No 1456).

### Surgical Procedures and NRG $\beta$ 1 Delivery

In the first two experimental groups, rats were deeply anesthetized with intraperitoneal injection of 7% chloral hydrate (Sigma-Aldrich, St. Louis, MO, USA) and underwent the ESN microsurgery as described previously [15]. Briefly, an incision was made along the left mid-clavicular line to expose the left brachial plexus. The ulnar (UnN) and musculocutaneous (McN) nerves were revealed. McN was then transected at the margin of the pectoralis major muscle. Following that, an epineurial window matching the size of McN was slit open on the UnN, taking care not to damage its containing axons, so that the cut end of McN could be attached to the UnN (end-to-side) with 10-0 nylon sutures. Immediately after ESN, animals in the second group were received 2  $\mu\text{L}$  of NRG  $\beta$ 1 treatment (10 nM, a dose which in a number of different assays we have found to be optimum in regulating Sc function) injecting directly into the distal end of McN. As NRG  $\beta$ 1 has a short circulating half-life of approximately 30 min, the distal end of McN soaked with NRG  $\beta$ 1 was enclosed by Gelfoam (Pharmacia & Upjohn, Kalamazoo, MI, USA) to maintain local concentration of NRG  $\beta$ 1 and sustain the pharmacological effect. The functional recovery and the effects of NRG  $\beta$ 1 on nerve regeneration were evaluated by retrograde

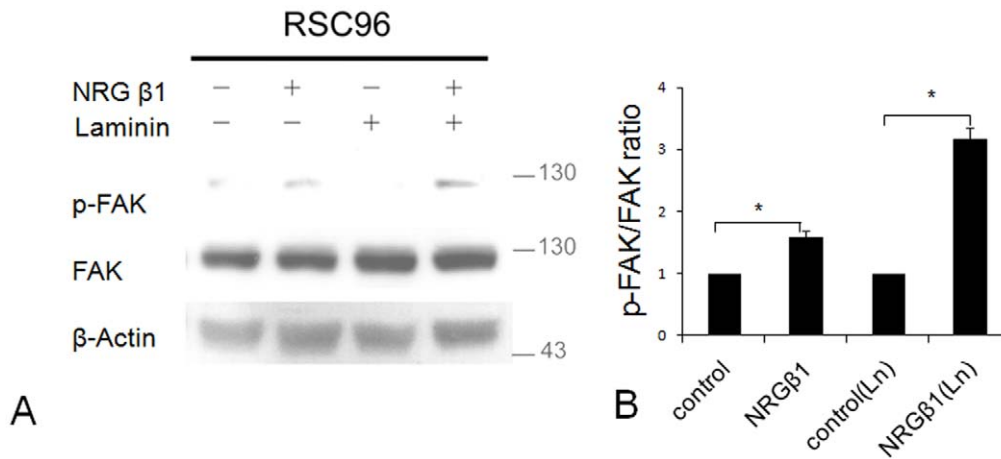

**Figure 5. Immunoblottings (A) and histogram (B) showing the effects of neuregulin  $\beta$ 1 (NRG  $\beta$ 1) on focal adhesion kinase (FAK) phosphorylation in RSC96 cells seeding on poly-L-lysine (PLL) or laminin-coated plates.** The physical association of erbB-FAK signaling was analyzed by the ratio expressed as phosphorylated FAK (p-FAK) over total FAK. Note that NRG  $\beta$ 1 extensively increases erbB-FAK activation in both PLL and laminin-coated plates with the most significant effect observed in the later group. \* $P < 0.05$  as compared to that of control value. doi:10.1371/journal.pone.0053444.g005

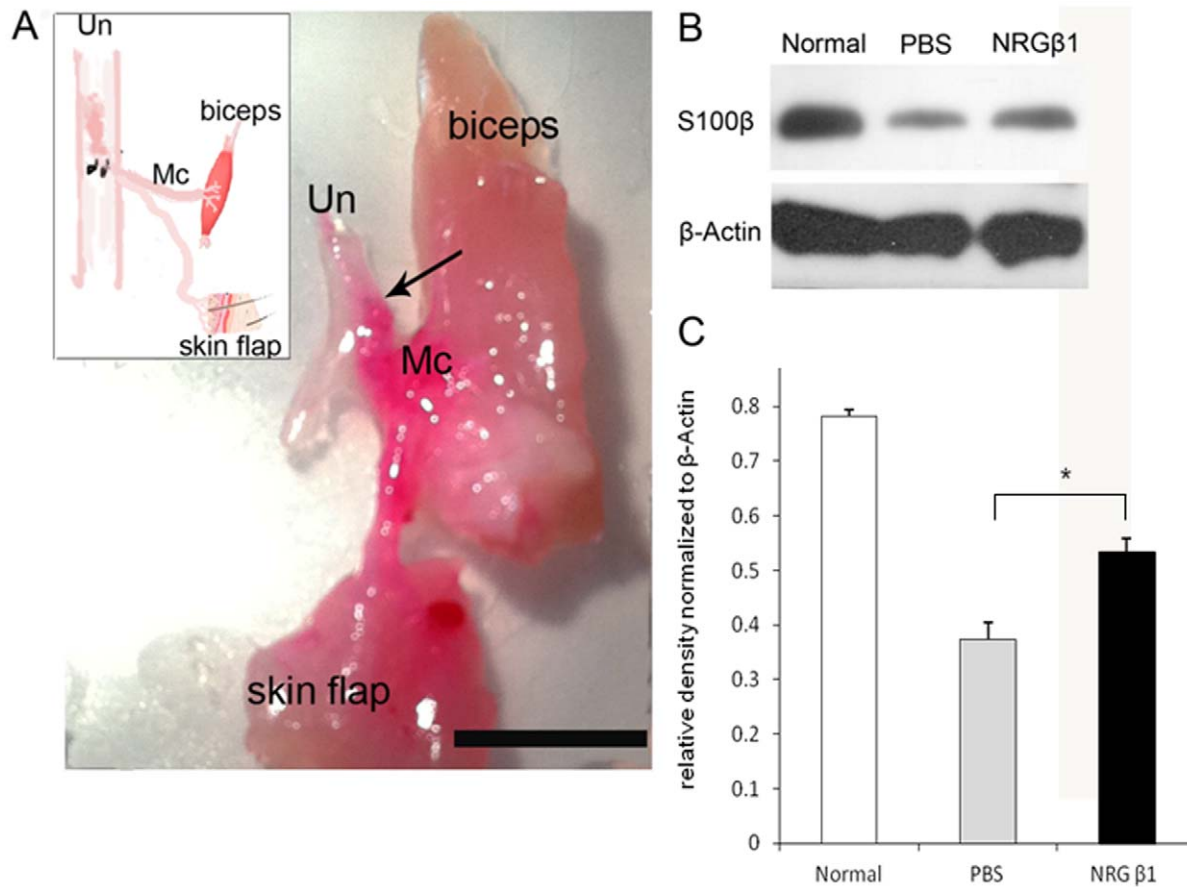

**Figure 6. Photograph (A) and schematic diagram [inset in (A)] showing the effects of neuregulin  $\beta$ 1 (NRG  $\beta$ 1) on the process of nerve regeneration two months after end-to-side neurorrhaphy (ESN).** The regenerated axons were labeled by the retrograde tracer Dil (red). Note that after NRG  $\beta$ 1 treatment, the majority of axons from ulnar nerve (Un) successfully innervates the biceps muscle and skin flap via the side-implanted musculocutaneous nerve (Mc, arrow indicates the suture site). Scale bar = 1 cm). Also note that this good neuro-regeneration was accompanied by the higher amounts of Schwann cells migrated to the Mc following NRG  $\beta$ 1 as compared to that of phosphate buffer saline (PBS) treated group [detected by S100 $\beta$  immunoblotting (B) and expressed in quantitative histogram (C)]. \* $P < 0.05$  as compared to that of PBS treated value. doi:10.1371/journal.pone.0053444.g006

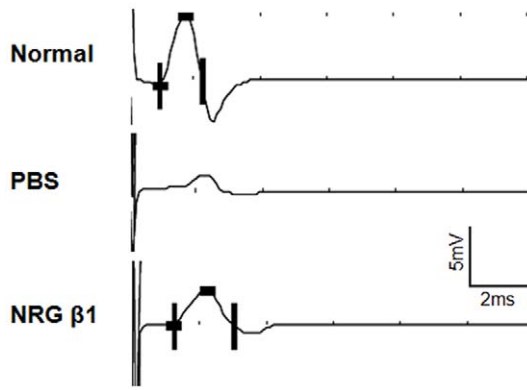

**Figure 7. Compound muscle action potential recordings (CMAPs) of the biceps brachii muscle upon activation of the musculocutaneous nerve one month following end-to-side neurotomy (ESN).** Responses were recorded from normal rats (upper panel), phosphate buffer saline (PBS) treated rats (middle panel) and neuregulin  $\beta$ 1 (NRG  $\beta$ 1) treated rats (lower panel) with stimulus applied above the neurotomy site. Note that NRG  $\beta$ 1 effectively promotes nerve regeneration and functional recovery by triggering larger CMAP than that of PBS-treated ones.  
doi:10.1371/journal.pone.0053444.g007

tracing (DiI), S-100 protein expression, and compound muscle action potential recordings (CMAP) one and two months later following the nerve injury.

### Functional Measurement of Nerve Regeneration by Electrophysiological Recordings

In order to test the extent of functional recovery, the compound muscle action potentials (CMAP) generated by the repaired nerve were measured by the Viking Quest electromyogram (Nicolet Biomedical, Madison, WI, USA) one month after ESN. The CMAPs were recorded from needle electrodes placed in the biceps brachii. A stimulating strength of 0.2 Hz at 11 mA was used to map the McN as reported in our previous study [24]. At least three trials were recorded at each stimulus. Normal control responses were recorded from intact McN of similarly aged normal rats with similar paradigm. Data acquired were recorded digitally and the amplitudes of the responses analyzed.

### Statistical Analysis

All quantitative data acquired from *in vitro* and *in vivo* studies were firstly underwent the Kolmogorov-Smirnov test for analyzing the pattern of normality. Those qualified ( $P>0.1$ ) were subsequently processed for one-way ANOVA followed by Bonferroni post hoc test. The Mann-Whitney *U*-test was used if normality or equal variance test failed. The statistical significance was considered if  $P<0.05$ .

## Results

### NRG $\beta$ 1 Activates erbB2/3 Expression on RSC96 Schwann Cells

In order to evaluate whether NRG  $\beta$ 1 would effectively activate the erbB2/3 receptor of RSC96 Schwann cells, the erbB2/3 expression was detected by immunofluorescence. The results indicated that all RSC96 cells were positively stained for erbB2 and erbB3 with or without NRG  $\beta$ 1 treatment (Figs. 1A,B,E,F). The erbB2 and erbB3 immunoreactivities were predominantly presented in the cell membrane and cell processes (Figs. 1C,G). However, following NRG  $\beta$ 1 treatment, both the erbB2 and

erbB3 were significantly expressed throughout the full length of spindle processes (Fig. 1G, arrows) and aggregated to the perinuclear region (Fig. 1H, arrowhead) as compared to that without NRG  $\beta$ 1 treatment.

### NRG $\beta$ 1 Promotes RSC96 Schwann Cells Attachment

With the purpose of investigating the potential effects of NRG  $\beta$ 1 on cell attachment, the cell adhesion, spreading, and migration assays were performed on RSC96 Schwann cells. The results indicated that NRG  $\beta$ 1 effectively enhanced the ability of cell attachment by significantly increasing the adherent cells to  $127.2\pm 5.0\%$  as compared to that of control group (Fig. 2A). Subsequently cell spreading assay corresponded well with cell attachment in which NRG  $\beta$ 1 noticeably increase the percentage of cell spreading up to nearly five-folds ( $24.0\pm 2.2\%$  in NRG  $\beta$ 1 treated group vs.  $5.0\pm 0.2\%$  in control group) than that of control ones (Fig. 2B).

### NRG $\beta$ 1 Promotes RSC96 Schwann Cells Migration

The extent of cell migration was assessed by the Boyden chamber system. In cells exposed to NRG  $\beta$ 1 treatment (Fig. 3B), the number of migrated cells was significantly larger than that of control group (Fig. 3A). Quantitative data showed that the extent of cell migration was  $800\pm 57$  cells per observed field in NRG  $\beta$ 1 treated group as compared to that of  $508\pm 8$  cells in control group (Fig. 3C).

### NRG $\beta$ 1 Induces Rapid Tyrosine Phosphorylation of erbB2 in RSC96 Schwann Cells

Figure 4 immunoblotting showing an increase in tyrosine phosphorylation signal of 185 kDa corresponding to erbB2 receptor identified at 1 min. following NRG  $\beta$ 1 treatment. The NRG  $\beta$ 1 induced tyrosine phosphorylation of whole membrane proteins was first detected by 4G10 (Fig. 4A), and then the 4G10-reactive phosphorylated protein was further confirmed to be erbB2 receptor by immunoprecipitation experiments (Fig. 4B).

### NRG $\beta$ 1 Stimulates RSC96 Schwann Cells Migration through erbB2/3-FAK Pathway

As attempts to investigate whether the effects of NRG  $\beta$ 1 were mediated by the intracellular erbB2/3-FAK pathway, the physical association of NRG  $\beta$ 1 stimulation and FAK activation was assessed by the western-blot analysis. The results indicated that NRG  $\beta$ 1 significantly induce FAK phosphorylation in cells seeding either on poly-D-lysine (PDL) or laminin-coated plates (Fig. 5A). Densitometric analysis [as expressed by the ratio measure from phosphorylated FAK (p-FAK) over total FAK] also indicated that NRG  $\beta$ 1 effectively stimulated intracellular FAK activation with the response more efficient in cells seeding on laminin-coated environment (1.6 fold vs. 3.2 fold in PDL and laminin-coated plates, respectively, as compared to those of NRG  $\beta$ 1-negative groups) (Fig. 5B).

### Effect of NRG $\beta$ 1 on Speeding the Nerve Regeneration Following ESN Injury

In the present study, we employed the end-to-side neurotomy (ESN) as a PNI model to detect the possible effects of NRG  $\beta$ 1 on facilitating the processes of nerve regeneration. Behavioral test indicated that at one month following ESN, the phosphate buffer saline (PBS) treated rats could raise the affected forepaw to groom below the eyes. However, in animals treated with NRG  $\beta$ 1, they could raise the injured forepaw to groom the ears and even to the posterior side of the ears at one and two months following ESN,

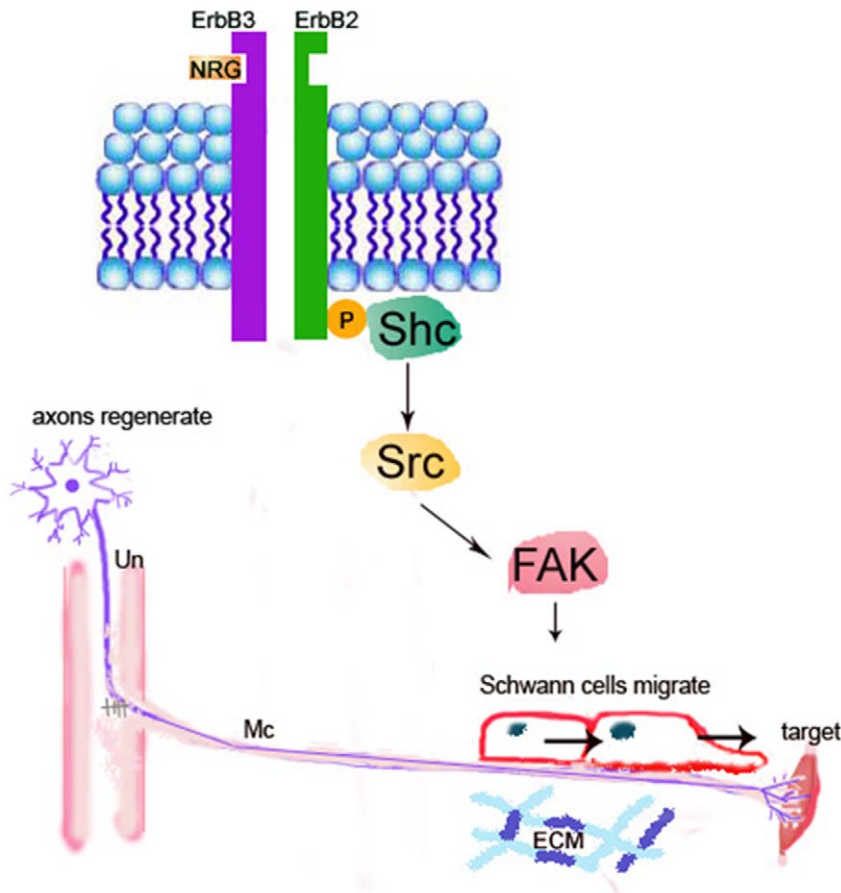

**Figure 8. Schematic diagram showing the NRG-erbB-FAK signaling in the repairing process following peripheral nerve injury (PNI).** Following PNI [as created by end-to-side neurorrhaphy (ESN)], NRG would activate the erbB2-FAK pathway that promotes the Schwann cells to migrate to the distal stump for successful axonal guidance and nerve regeneration. Un: ulnar nerve; Mc: musculocutaneous nerve; ECM: extracellular matrix. doi:10.1371/journal.pone.0053444.g008

respectively. The beneficial effects of NRG  $\beta$ 1 on facilitating nerve regeneration was further validated by retrograde labeling and electrophysiological recordings in which the regenerated axons successfully re-innervated the target muscles and generated higher CMAPs ( $3.0 \pm 0.2$  mV vs.  $1.2 \pm 0.3$  mV in NRG  $\beta$ 1 and PBS treated groups, respectively) after ESN (Figs. 6A, 7). Immunoblotting analysis of Schwann cell marker (S100 $\beta$ ) also coincided with the behavioral and neurochemical findings in which NRG  $\beta$ 1 promoted larger amounts of Schwann cells migrating to the distal stump as compared to that of PBS-treated group (Figs. 6B,C). These results indicated that NRG  $\beta$ 1 could facilitate nerve regeneration by speeding the Schwann cell migration to the injured site and serve as a crucial substrate for subsequent remyelination and axonal guidance following PNI.

## Discussion

The present study is the first one employing both *in vitro* and *in vivo* approaches to clearly provide the functional anatomical evidence that NRG  $\beta$ 1 could significantly facilitate nerve regeneration by speeding Sc migration following peripheral nerve injury. The advanced effects of NRG  $\beta$ 1 were mediated by erbB2/3 receptors, which subsequently promote FAK phosphorylation and activate the downstream signaling related to migration activity (Fig. 8). It is indicated that adequate migration of Sc is crucial for the regeneration of injured nerves [6,7]. By producing

various kinds of functional substances such as diffusible neurotrophic factors, extracellular matrix and cell adhesion molecules, Sc could provide structural stability of the regenerating axons that facilitates axo-glial interaction and promotes functional recovery [25–27]. During the past few years, the NRG1-erbB signaling has emerged as a key regulator of axo-glial interaction, which plays an important role in the differentiation, proliferation, maturation and migration of Sc during development [28]. A variety of evidences have demonstrated that animals lacking NRG1 or erbB2/3 would cause a complete absence of Sc precursor generation and inhibit the migration of Sc beyond dorsal root ganglion into the peripheral nerves [29–31]. Other than regulate the developmental progress of Sc, NRG1-erbB signaling has also been reported to contribute to the regenerative function following adult peripheral nerve injury [20]. It is indicated that exogenous treatment of NRG  $\beta$ 1 would increase the length of regenerating axons and improve the functional outcome after sciatic nerve injury [32,33]. Pharmacological reports also documented that following facial nerve transection, NRG  $\beta$ 1 could increase the Sc nuclei and reduce the myelin debris [34]. Our current study was thus in good agreement with these findings in which application of NRG  $\beta$ 1 also showed an increase of migrated Sc and speeding the nerve regeneration following end-to-side neurorrhaphy (Figs. 6, 7). However, although NRG1 has beneficial effects on peripheral nerve regeneration, the potential mechanism(s) of how NRG1 signaling may modulate the nerve regeneration has not been extensively

explored. With regard to this viewpoint, our present study further examined the intracellular FAK expression, which has previously been shown to participate in signal transduction induced by laminin and serve as the downstream molecule engaged in Sc migration through NRG1-erbB signaling [21]. The results indicated that NRG1 significantly enhanced FAK expression in both PLL and PLL plus laminin coated slides (Fig. 5). The increased level of FAK expression following NRG1 exposure clearly implies that NRG1 and laminin could act synergistically to enhance Sc migration through the NRG-erbB-FAK pathway. To our knowledge, this study is the first one presenting both *in vivo* and *in vitro* evidences to clarify the advanced effects (and its underlying mechanism) of NRG1. By great unraveling and manipulating of such signaling events will give us new opportunity to facilitate nerve repair and promote the functional restoration following peripheral nerve injury.

In the present study, we use the RSC96 cell line to detect the degree of cell attachment, cell migration and erbB2/3 immunoreactivities following NRG1 treatment. One might concerned that the endogenous properties of immortalized Sc is different to that of primary Sc, which is therefore not suitable to use as a model for cellular analysis. As RSC96 cell line is commonly utilized in the analyses of cell mobility [23,35] and is well-characterized in their enriched expression of Sc related protein when compared to that of primary Sc [36], the RSC96 cell line was thus serve as a good material to evaluate the functional effects of NRG1 on Sc protein expression and cellular activities.

## References

- Evans GR (2001) Peripheral nerve injury: a review and approach to tissue engineered constructs. *Anat Rec* 263: 396–404.
- Robinson MD, Shannon S (2002) Rehabilitation of peripheral nerve injuries. *Phys Med Rehabil Clin N Am* 13: 109–135.
- Priestley JV (2007) Promoting anatomical plasticity and recovery of function after traumatic injury to the central or peripheral nervous system. *Brain* 130: 895–897.
- Fawcett JW, Keynes RJ (1990) Peripheral nerve regeneration. *Annu Rev Neurosci* 13: 43–60.
- Koeppen AH (2004) Wallerian degeneration: history and clinical significance. *J Neurol Sci* 220: 115–117.
- Schlosshauer B, Muller E, Schroder B, Planck H, Muller HW (2003) Rat Schwann cells in bioresorbable nerve guides to promote and accelerate axonal regeneration. *Brain Res* 963: 321–326.
- Tseng CY, Hu G, Ambron RT, Chiu DT (2003) Histologic analysis of Schwann cell migration and peripheral nerve regeneration in the autogenous venous nerve conduit (AVNC). *J Reconstr Microsurg* 19: 331–340.
- Corfas G, Velardez MO, Ko CP, Ratner N, Peles E (2004) Mechanisms and roles of axon-Schwann cell interactions. *J Neurosci* 24: 9250–9260.
- Cheng C, Zochodne DW (2002) *In vivo* proliferation, migration and phenotypic changes of Schwann cells in the presence of myelinated fibers. *Neuroscience* 115: 321–329.
- Guertin AD, Zhang DP, Mak KS, Alberta JA, Kim HA (2005) Microanatomy of axon/glia signaling during Wallerian degeneration. *J Neurosci* 25: 3478–3487.
- Lemke G (1996) Neuregulins in development. *Mol Cell Neurosci* 7: 247–262.
- Mei L, Xiong WC (2008) Neuregulin 1 in neural development, synaptic plasticity and schizophrenia. *Nat Rev Neurosci* 9: 437–452.
- Newbern J, Birchmeier C (2010) NRG1/erbB signaling networks in Schwann cell development and myelination. *Semin Cell Dev Biol* 21: 922–928.
- Falls DL (2003) Neuregulins: functions, forms, and signaling strategies. *Exp Cell Res* 284: 14–30.
- Wen D, Peles E, Cupples R, Suggs SV, Bacus SS, et al. (1992) Neu differentiation factor: a transmembrane glycoprotein containing an EGF domain and an immunoglobulin homology unit. *Cell* 69: 559–572.
- Pinkas-Kramarski R, Shelly M, Glathe S, Ratzkin BJ, Yarden Y (1996) Neu differentiation factor/neuregulin isoforms activate distinct receptor combinations. *J Biol Chem* 271: 19029–19032.
- Liu Z, Gao W, Wang Y, Zhang W, Liu H, et al. (2011) Neuregulin-1 $\beta$  regulates outgrowth of neurites and migration of neurofilament 200 neurons from dorsal root ganglion explants *in vitro*. *Peptides* 32: 1244–1248.
- Eckert JM, Byer SJ, Clodfelder-Miller BJ, Carroll SL (2009) Neuregulin-1 $\beta$  and neuregulin-1 $\alpha$  differentially affect the migration and invasion of malignant peripheral nerve sheath tumor cells. *Glia* 57: 1501–1520.
- Gambarotta G, Garzotto D, Destro E, Mautino B, Giampietro C, et al. (2004) ErbB4 expression in neural progenitor cells (ST14A) is necessary to mediate neuregulin-1 $\beta$ -induced migration. *J Biol Chem* 279: 48808–48816.
- Fricker FR, Bennett DL (2011) The role of neuregulin-1 in the response to nerve injury. *Future Neurol* 6: 809–822.
- Vartanian T, Goodearl A, Lefebvre S, Park SK, Fischbach G (2000) Neuregulin induces the rapid association of focal adhesion kinase with the erbB2-erbB3 receptor complex in Schwann cells. *Biochem Biophys Res Commun* 271: 414–417.
- Liao WC, Chen JR, Wang YJ, Tseng GF (2009) The efficacy of end-to-end and end-to-side nerve repair (neurorrhaphy) in the rat brachial plexus. *J Anat* 215: 506–521.
- Lu MC, Lai TY, Hwang JM, Chen HT, Chang SH, et al. (2009) Proliferation- and migration-enhancing effects of ginseng and ginsenoside Rg1 through IGF-I and FGF-2-signaling pathways on RSC96 Schwann cells. *Cell Biochem Funct* 27: 186–192.
- Liao WC, Chen JR, Wang YJ, Tseng GF (2010) Methylcobalamin, but not methylprednisolone or pleiotrophin, accelerates the recovery of rat biceps after ulnar to musculocutaneous nerve transfer. *Neuroscience* 171: 934–949.
- Frostick SP, Yin Q, Kemp GJ (1998) Schwann cells, neurotrophic factors, and peripheral nerve regeneration. *Microsurgery* 18: 397–405.
- Chernousov MA, Carey DJ (2000) Schwann cell extracellular matrix molecules and their receptors. *Histol Histopathol* 15: 593–601.
- Dezawa M (2000) The interaction and adhesive mechanisms between axon and Schwann cell during central and peripheral nerve regeneration. *Kaibogaku Zasshi* 75: 255–265.
- Garratt AN, Britsch S, Birchmeier C (2000) Neuregulin, a factor with many functions in the life of a Schwann cell. *Bioessays* 22: 987–996.
- Meyer D, Birchmeier C (1995) Multiple essential functions of neuregulin in development. *Nature* 378: 386–390.
- Morris JK, Lin W, Hauser C, Marchuk Y, Getman D, et al. (1999) Rescue of the cardiac defect in erbB2 mutant mice reveals essential roles of the erbB2 in peripheral nervous system development. *Neuron* 23: 273–283.
- McIntanis S, Thomaidou D, Jessen KR, Mirsky R, Matsas R (2001) The neuron-glia signal  $\beta$ -neuregulin promotes Schwann cell motility via the MAPK pathway. *Glia* 34: 39–51.
- Chen LE, Liu K, Seaber AV, Katragadda S, Kirk C, et al. (1998) Recombinant human glial growth factor 2 (rhGGF2) improves functional recovery of crushed peripheral nerve (a double-blind study). *Neurochem Int* 33: 341–351.
- Joung I, Yoo M, Woo JH, Chang CY, Heo H, et al. (2010) Secretion of EGF-like domain of heregulin $\beta$  promotes axonal growth and functional recovery of injured sciatic nerve. *Mol Cell* 30: 477–484.
- Yildiz M, Karlidag T, Yalcin S, Ozogul C, Keles E, et al. (2011) Efficacy of glial growth factor and nerve growth factor on the recovery of traumatic facial paralysis. *Eur Arch Otorhinolaryngol* 268: 1127–1133.



35. Fang WK, Ko FY, Wang HL, Kuo CH, Chen LM, et al. (2009) The proliferation and migration effects of Huangqi on RSC96 Schwann cells. *Am J Chin Med* 37: 945–959.
36. Ji Y, Shen M, Wang X, Zhang S, Yu S, et al. (2012) Comparative Proteomic Analysis of Primary Schwann Cells and a Spontaneously Immortalized Schwann Cell Line RSC 96: A Comprehensive Overview with a Focus on Cell Adhesion and Migration Related Proteins. *J Proteome Res.*
37. Adilakshmi T, Ness-Myers J, Madrid-Aliste C, Fiser A, Tapinos N (2011) A nuclear variant of erbB3 receptor tyrosine kinase regulates ezrin distribution and Schwann cell myelination. *J Neurosci* 31: 5106–5119.
